# Supplementary material
Source: MDPI journal article supplement (https://www.mdpi.com/2073-4352/13/5/785)
Supplement: s1 [file s1]

## **Electronic Supplementary Information**

# **Preparation of Thiadiazole Modified UiO-68-CdS Composites for RhB Degradation under Visible Light Irradiation**

**Lian-Qiang Wei<sup>1</sup>, Jiu-Bin Wei<sup>1</sup>, Fei Yang<sup>1</sup>, Zhi-Wei Li<sup>2</sup>, Hong-Fang Lai<sup>1,\*</sup>**

<sup>1</sup> Guangxi Key Laboratory of Sericulture Ecology and Applied Intelligent Technology, Hechi University, Hechi, 546300, P. R. China.

<sup>2</sup> MOE Key Laboratory of Bioinorganic and Synthetic Chemistry, School of Chemistry, Sun-Yat Sen University, Guangzhou, 510275, P. R. China

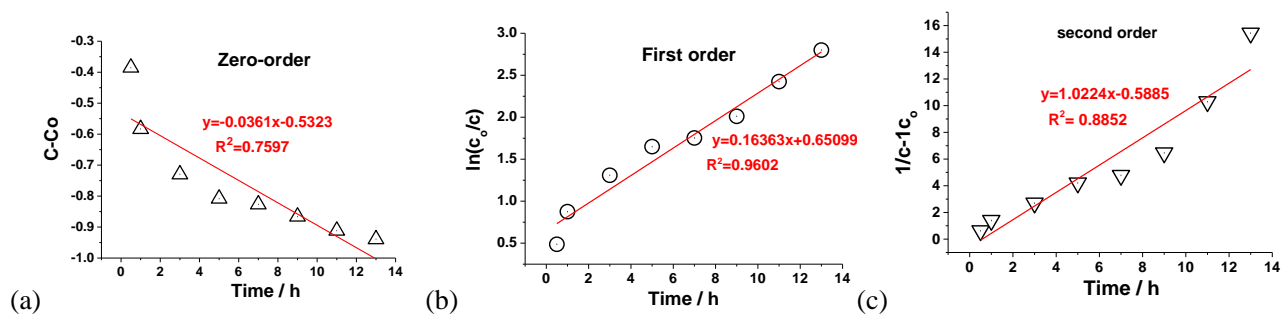

Figure S1. Kinetic analysis for the RhB photo degradation with CdS@UiO68-N<sub>2</sub>S, experimental data were fitted with zero-order, first-order and second-order models.

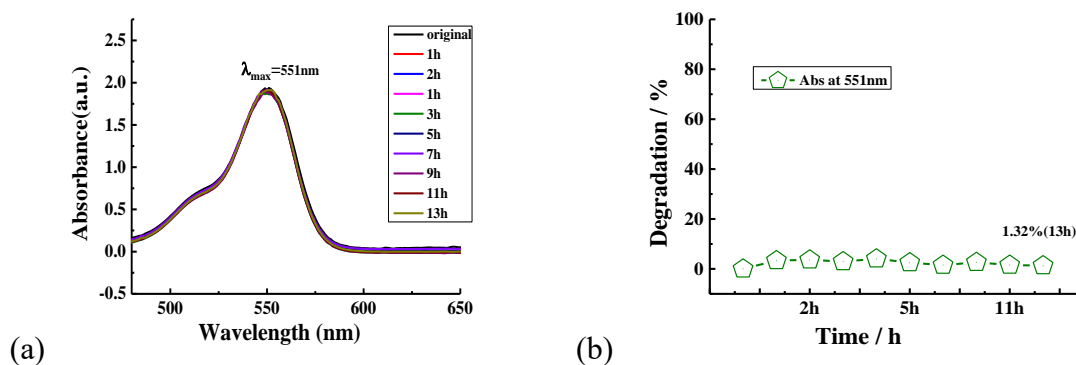

Figure S2. Photocatalytic degradation pattern of RhB without catalyst (a) and the curve of degradation rate with time (b)

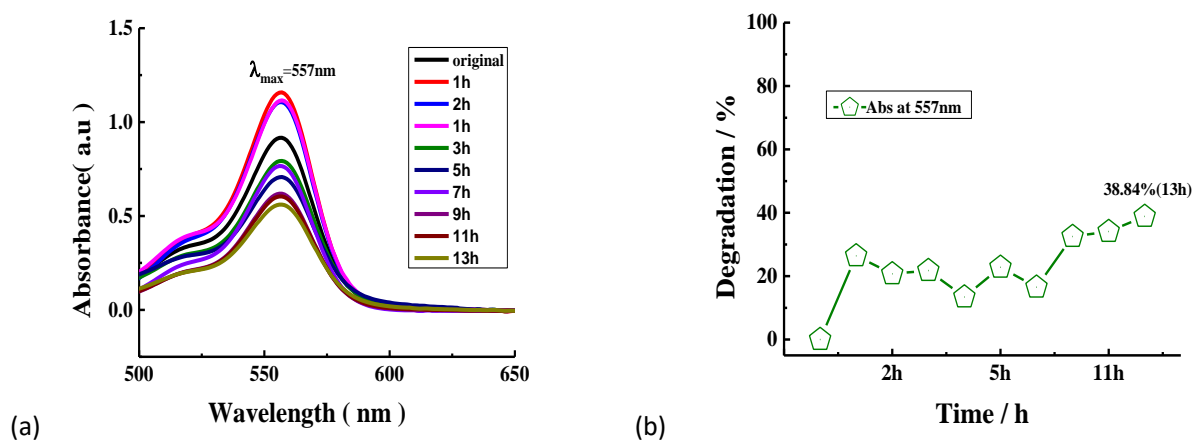

Figure S3. Photocatalytic degradation pattern of RhB by UiO-68N<sub>2</sub>S (a) and the degradation rate of RhB with time (b)

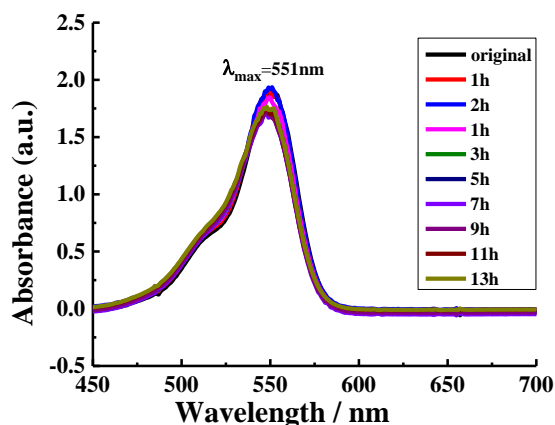

(a)

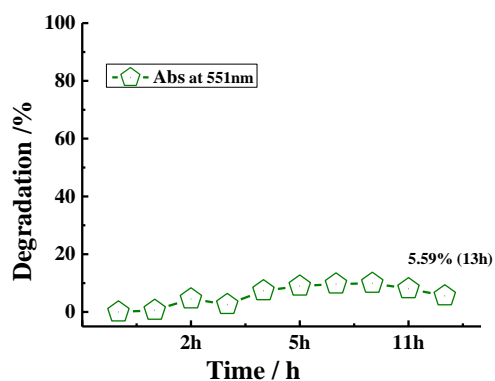

(b)

Figure S4. Photocatalytic degradation pattern of Rh B by CdS (a) and the degradation rate of RhB with time.

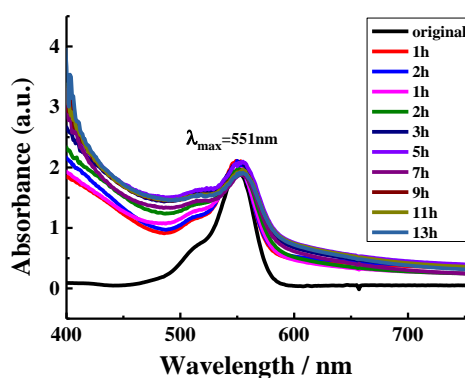

(a)

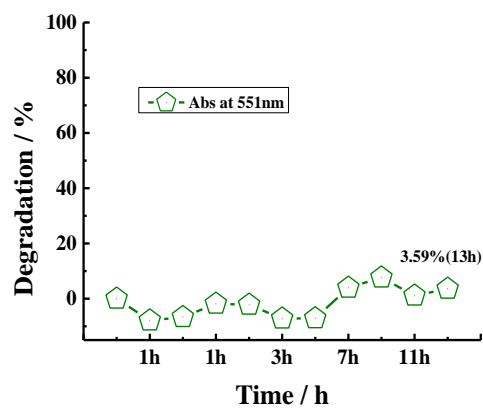

(b)

Figure S5. Photocatalytic degradation pattern of RhB by CdS@UiO-68N<sub>2</sub>S in the presence of p-benzoquinone (a) and its degradation rate with time (b)

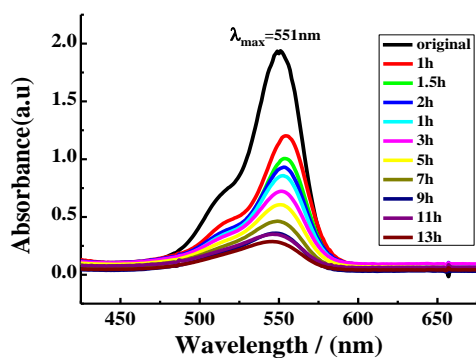

(a)

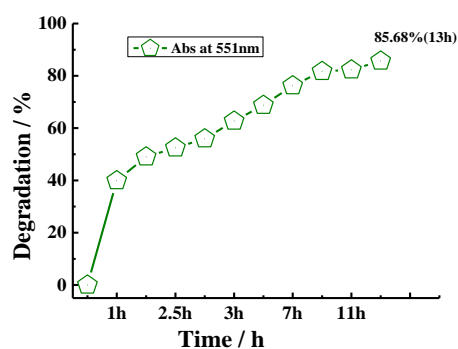

(b)

Figure S6. Photocatalytic degradation pattern of RhB by CdS@UiO-68N<sub>2</sub>S in the presence of tert-butanol (a) and its degradation rate with time (b)
